# Supplementary material for: Optimal Waist Circumference Cutoff Value Based on Insulin Resistance and Visceral Obesity in Koreans with Type 2 Diabetes
Source: PubMed Central journal article supplement — Diabetes Metab J. 2015 Apr 24;39(3):253–63. doi: 10.4093/dmj.2015.39.3.253 (PMC4483611; doi:10.4093/dmj.2015.39.3.253), 2015-04-24
Supplement: dmj-39-253-s001.pdf [file dmj-39-253-s001.pdf]

**Supplementary Table 1.** Baseline characteristics according to insulin sensitivity (*kitt*%)

| Characteristic                     | Men           |                            |                             |                | Women         |                           |                             |                |
|------------------------------------|---------------|----------------------------|-----------------------------|----------------|---------------|---------------------------|-----------------------------|----------------|
|                                    | Low tertile   | Middle tertile             | High tertile                | <i>P</i> value | Low tertile   | Middle tertile            | High tertile                | <i>P</i> value |
| Age, yr                            | 56.84±11.72   | 56.76±10.99                | 55.01±10.54 <sup>a,b</sup>  | <0.001         | 60.22±9.92    | 60.30±9.31                | 58.67±9.54 <sup>a,b</sup>   | <0.001         |
| DM duration, yr                    | 8.39±7.63     | 7.36±7.05 <sup>a</sup>     | 6.38±6.62 <sup>a,b</sup>    | <0.001         | 9.02±6.76     | 7.57±6.70 <sup>a</sup>    | 6.48±6.42 <sup>a,b</sup>    | <0.001         |
| Body mass index, kg/m <sup>2</sup> | 24.69±3.35    | 24.54±3.35                 | 24.34±3.16                  | 0.071          | 24.58±3.28    | 24.63±3.26                | 24.76±3.59                  | 0.52           |
| Waist circumference, cm            | 89.25±7.85    | 87.59±7.17 <sup>a</sup>    | 85.05±7.12 <sup>a,b</sup>   | <0.001         | 83.64±8.15    | 81.87±7.50 <sup>a</sup>   | 79.48±8.10 <sup>a,b</sup>   | <0.001         |
| <i>Kitt</i> , %/min                | 1.04±0.29     | 1.86±0.23 <sup>a</sup>     | 3.08±0.64 <sup>a,b</sup>    | <0.001         | 1.06±0.29     | 1.86±0.22 <sup>a</sup>    | 3.04±0.68 <sup>a,b</sup>    | <0.001         |
| Fasting glucose, mg/dL             | 184.82±65.57  | 153.65±50.30 <sup>a</sup>  | 137.87±41.19 <sup>a,b</sup> | <0.001         | 184.28±64.10  | 149.74±50.52 <sup>a</sup> | 134.65±43.01 <sup>a,b</sup> | <0.001         |
| C-peptide, ng/mL                   | 2.35±0.92     | 2.08±0.73 <sup>a</sup>     | 1.88±0.75 <sup>a,b</sup>    | <0.001         | 2.29±0.98     | 2.03±0.78 <sup>a</sup>    | 1.77±0.67 <sup>a,b</sup>    | <0.001         |
| HbA1c, %                           | 9.07±2.02     | 8.17±1.74 <sup>a</sup>     | 7.75±1.70 <sup>a,b</sup>    | <0.001         | 9.10±1.83     | 8.20±1.69 <sup>a</sup>    | 7.63±1.45 <sup>a,b</sup>    | <0.001         |
| Total cholesterol, mg/dL           | 198.39±44.22  | 193.35±37.21 <sup>a</sup>  | 186.56±37.91 <sup>a,b</sup> | <0.001         | 209.65±44.00  | 204.43±40.82 <sup>a</sup> | 199.37±39.44 <sup>a,b</sup> | <0.001         |
| Triglyceride, mg/dL                | 189.50±143.78 | 161.09±109.20 <sup>a</sup> | 134.80±83.53 <sup>a,b</sup> | <0.001         | 184.68±119.44 | 155.30±93.79 <sup>a</sup> | 128.25±77.02 <sup>a,b</sup> | <0.001         |
| HDL-C, mg/dL                       | 46.42±12.25   | 46.75±11.72                | 48.27±12.17 <sup>a,b</sup>  | 0.001          | 49.39±12.16   | 51.34±13.24 <sup>a</sup>  | 52.32±13.07 <sup>a</sup>    | <0.001         |
| LDL-C, mg/dL                       | 115.53±36.53  | 113.63±31.09               | 109.77±31.34 <sup>a</sup>   | 0.001          | 122.74±36.71  | 120.26±35.54              | 118.92±33.72                | 0.09           |
| VFT, mm                            | 54.36±18.66   | 50.50±17.19 <sup>a</sup>   | 45.25±16.13 <sup>a,b</sup>  | <0.001         | 46.81±17.86   | 43.05±16.46 <sup>a</sup>  | 37.24±15.39 <sup>a,b</sup>  | <0.001         |
| CIMT, mm                           | 0.857±0.205   | 0.850±0.186                | 0.823±0.184 <sup>a,b</sup>  | <0.001         | 0.824±0.185   | 0.807±0.171               | 0.794±0.178 <sup>a</sup>    | 0.001          |
| MetS components <sup>c</sup>       |               |                            |                             |                |               |                           |                             |                |
| Hypertriglyceridemia               | 641 (57.4)    | 560 (50.0)                 | 408 (36.7)                  | <0.001         | 670 (64.4)    | 540 (51.9)                | 404 (38.9)                  | <0.001         |
| Low HDL-C                          | 306 (27.6)    | 279 (25.1)                 | 238 (21.6)                  | 0.004          | 568 (55.0)    | 530 (51.6)                | 478 (47.0)                  | 0.001          |
| Hypertension                       | 871 (79.4)    | 836 (75.5)                 | 760 (69.7)                  | <0.001         | 801 (77.7)    | 770 (75.8)                | 711 (70.1)                  | <0.001         |
| More than 2 factors                | 623 (56.7)    | 539 (48.8)                 | 414 (37.8)                  | <0.001         | 730 (71.1)    | 639 (62.8)                | 510 (50.7)                  | <0.001         |

Values are presented as mean ± standard deviation or number (%).

DM, diabetes mellitus; HbA1c, glycosylated hemoglobin; HDL-C, high density lipoprotein cholesterol; LDL-C, low density lipoprotein cholesterol; VFT, visceral fat thickness; CIMT, carotid intima-media thickness; MetS, metabolic syndrome.

<sup>a</sup>*P*<0.05 vs. low tertile, <sup>b</sup>*P*<0.05 vs. middle tertile, <sup>c</sup>Hypertriglyceridemia, triglycerides ≥150 mg/dL or taking medication; low HDL-C, <40 mg/dL for men and <50 mg/dL for women; hypertension, blood pressure ≥130/85 mm Hg or taking antihypertensive medication.
